# Supplementary material for: A rare dihydroxo copper(ii) complex with ciprofloxacin; a combined experimental and ONIOM computational study of the interaction of the complex with DNA and BSA
Source: Royal Society of Chemistry journal article supplement (doi:10.1039/c4ra04634j), 2014-08-04
Supplement: c4ra04634j1.pdf [file c4ra04634j1.pdf]

**Supporting Information**

**A rare dihydroxo copper(II) complex with ciprofloxacin; a  
combined experimental and ONIOM computational study of the  
interaction of the complex with DNA and BSA**

**Hossein Farrokhpour <sup>a,\*</sup>, Hassan Hadadzadeh <sup>a,\*</sup>, Farivash Darabi <sup>a</sup>, Fatemeh Abyar <sup>a</sup>,  
Hadi Amiri Rudbari <sup>b</sup>, Tahareh Ahmadi-Bagheri <sup>a</sup>**

<sup>a</sup> *Department of Chemistry, Isfahan University of Technology, Isfahan 84156-83111, Iran*

<sup>b</sup> *Faculty of Chemistry, University of Isfahan, Isfahan 81746-73441, Iran*

**Table. S1.** The DNA binding constants and parameters derived for ciprofloxacin and the Cu(II) complex.

|     | compound       | $K_{vs} \text{ M}^{-1}$ | $K_q \text{ M}^{-1}\text{s}^{-1}$ | $K_b \text{ M}^{-1}$ | $n$  | Ref       |
|-----|----------------|-------------------------|-----------------------------------|----------------------|------|-----------|
| DNA | Ciprofloxacin  | $1.09 \times 10^4$      | $1.09 \times 10^{12}$             | $3.98 \times 10^4$   | 1.12 | 1         |
|     | Cu(II) complex | $1.2 \times 10^4$       | $1.2 \times 10^{12}$              | $1.17 \times 10^4$   | 0.88 | work this |

**Table. S2.** The BSA binding constants and parameters derived for ciprofloxacin and the Cu(II) complex.

|     | compound       | $K_{vs} \text{ M}^{-1}$ | $K_q \text{ M}^{-1}\text{s}^{-1}$ | $K_b \text{ M}^{-1}$ | $n$  | Ref       |
|-----|----------------|-------------------------|-----------------------------------|----------------------|------|-----------|
| BSA | Ciprofloxacin  | $2.33 \times 10^4$      | $2.33 \times 10^{12}$             | $2.17 \times 10^4$   | 0.91 | 2         |
|     | Cu(II) complex | $6.38 \times 10^4$      | $6.38 \times 10^{12}$             | $4.08 \times 10^4$   | 0.97 | work this |

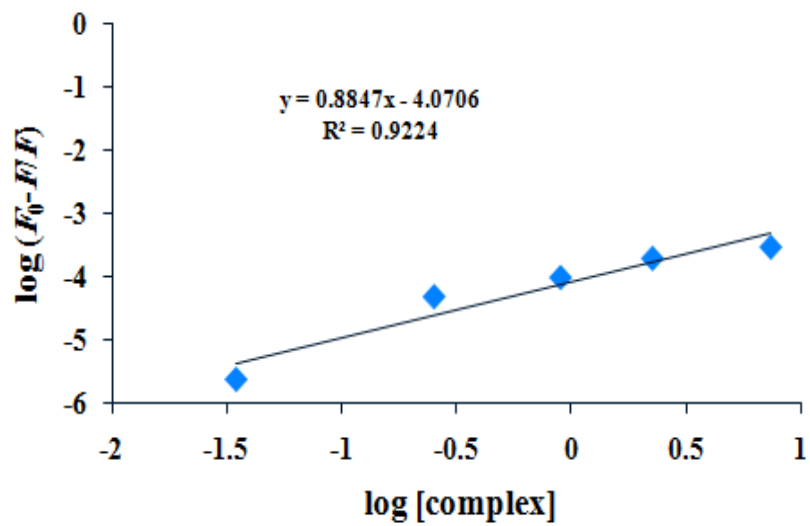

**Fig. S1** Plot of  $\log(F_0 - F)/F$  versus  $\log[\text{complex}]$ .

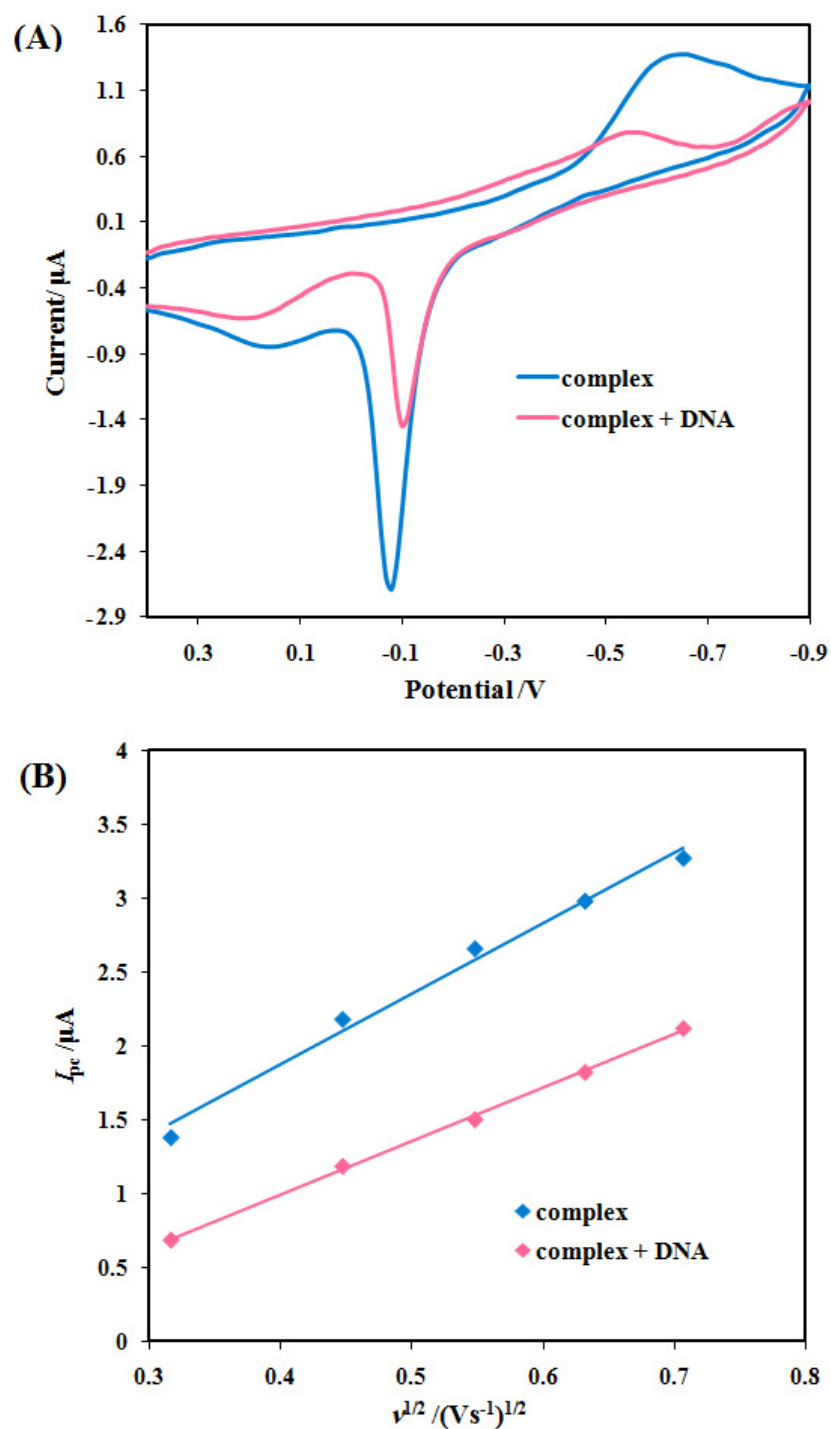

**Fig. S2** (A) Cyclic voltammograms of  $1.0 \times 10^{-3}$  M of the *trans*- $[\text{Cu}(\text{cip})_2(\text{OH})_2] \cdot 2\text{CH}_3\text{OH} \cdot 6\text{H}_2\text{O}$  in the absence and presence of CT-DNA (scan rate = 0.1 V/s). (B) The plots of the cathodic peak currents of the complex in the absence and presence of CT-DNA versus the square root of the scan rates ( $v^{1/2}$ ).

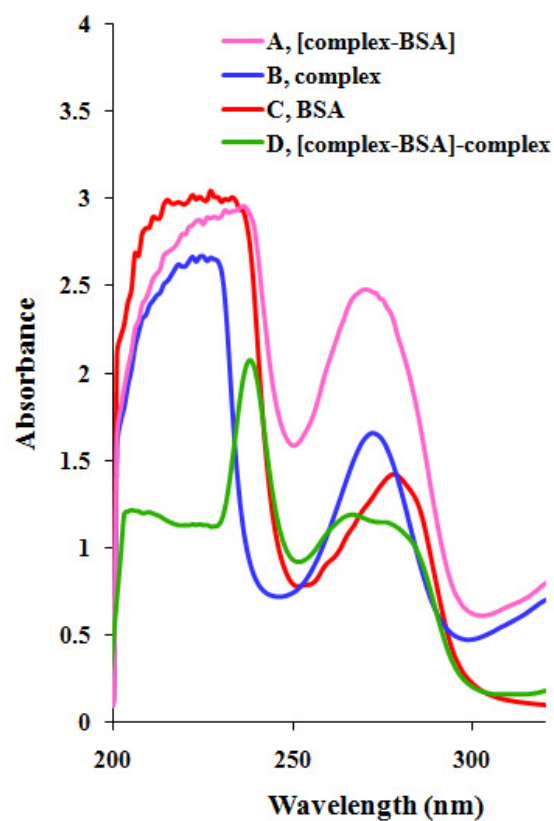

**Fig. S3** Electronic absorption spectra of BSA in the presence of the Cu(II) complex. (A) (pink) The absorption spectra of BSA-complex system when the mol ratio is 1:1; (B) (blue) the absorption spectra complex only; (C) (red) the absorption spectra of BSA only; (D) (green) the difference absorption spectra between the BSA-complex and the complex at the same concentration.

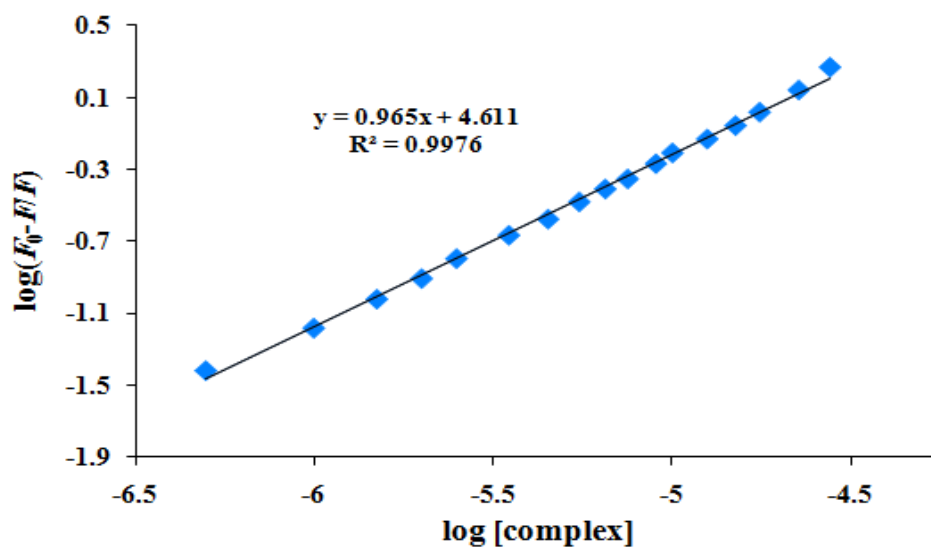

**Fig. S4** Determination of the complex-BSA binding constant and the number of binding sites on BSA.

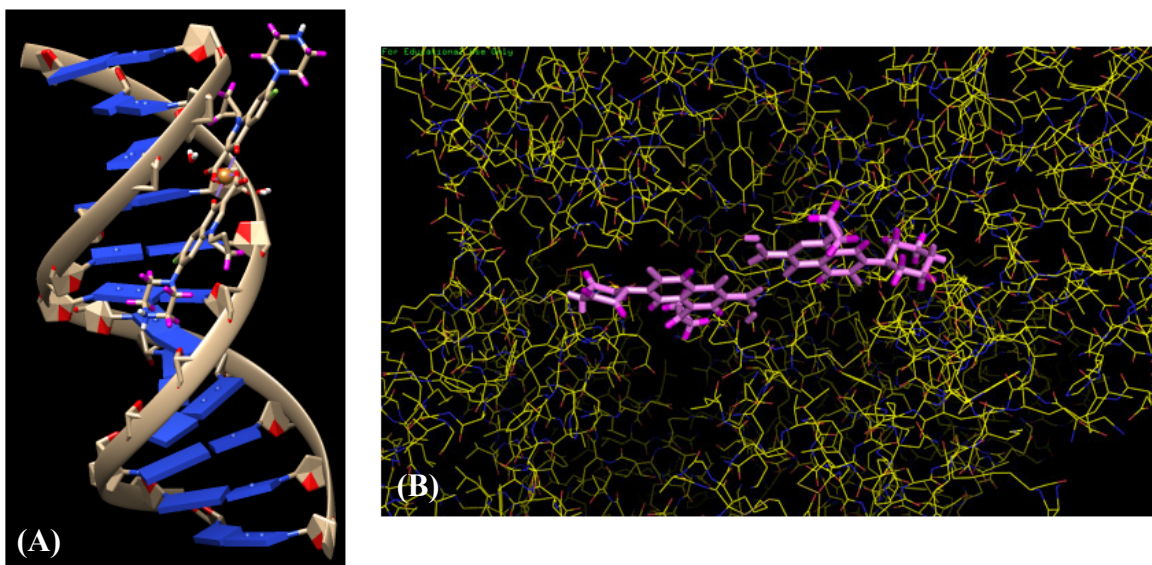

**Fig. S5** Molecular docking of the complex with DNA (A) and BSA (B).

## References

- 1 L. Fotouhi, Z. Atoofi and M. M. Heravi, *Talanta.*, 2013, **103**, 194–200.
- 2 Y.J. Hu, Y. Ou-Yang, Y. Zhang and Y. Liu, *Protein J.*, 2010, **29**, 234–241.
